# Supplementary material for: Brain Structural Features of Myotonic Dystrophy Type 1 and their Relationship with CTG Repeats
Source: PubMed Central journal article supplement (PMC7480174; doi:10.3233/jnd-190397), 2019

## Supplementary Figure 2A to AB:

Each panel (A through AB) shows the power-adjusted, standardized ROI on the y-axis as a function of standardized ICV on the x-axis. Individual observations are shown as circles and the regression line with confidence limits. All regression lines are horizontal, illustrating effective de-trending of ICV. pp = power-proportion

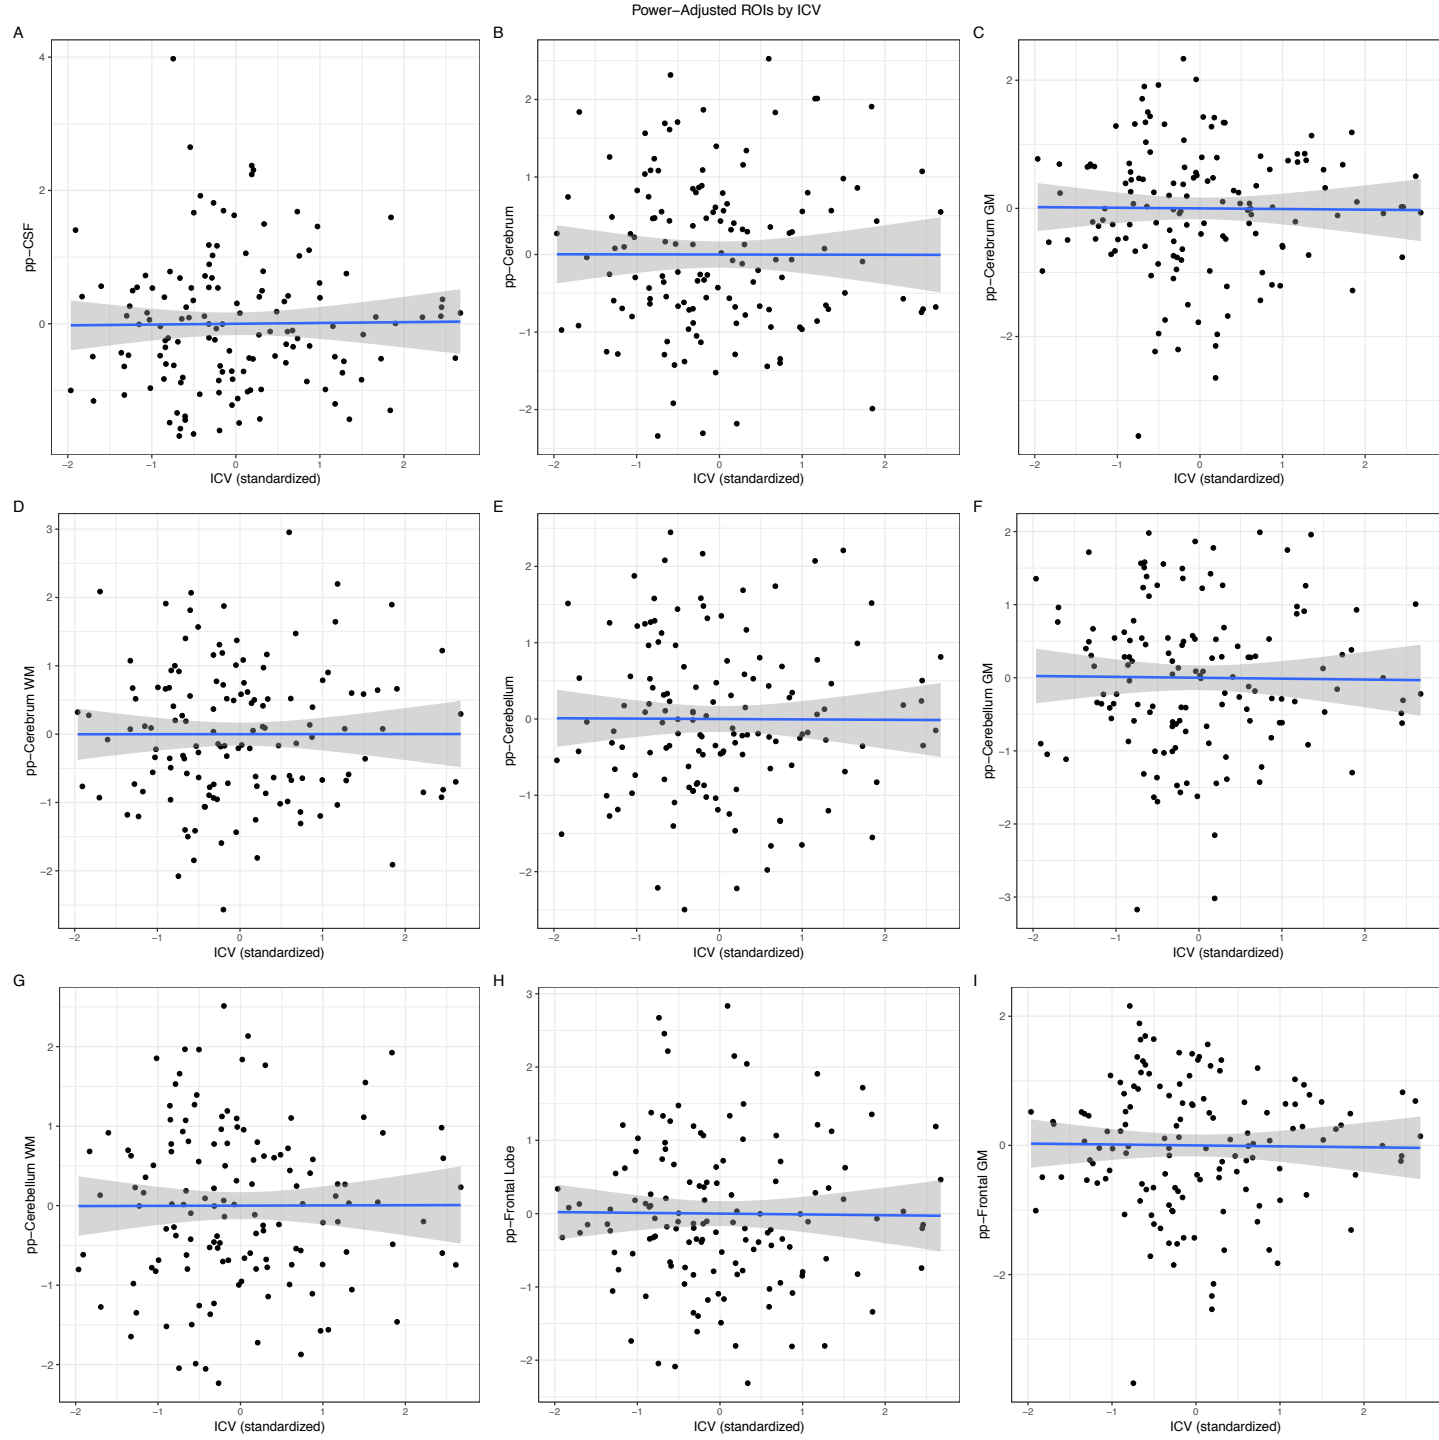

J

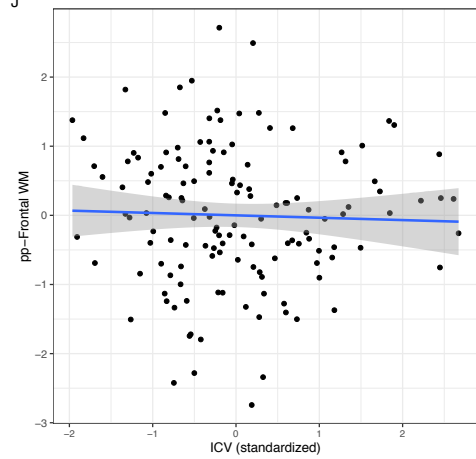

K

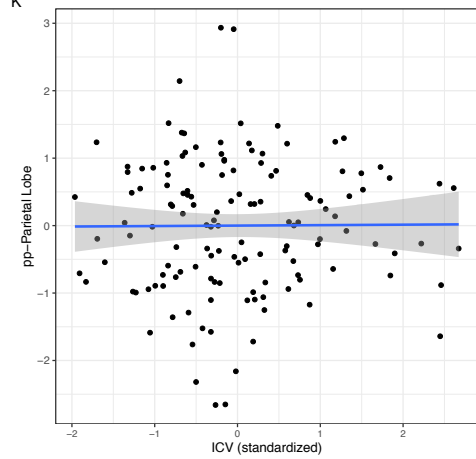

L

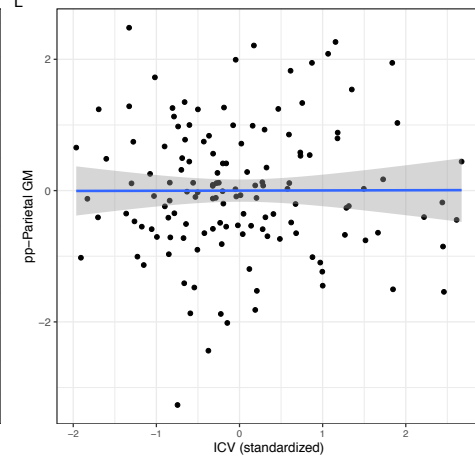

N

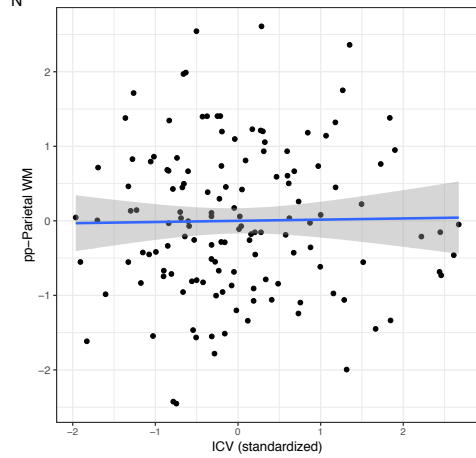

M

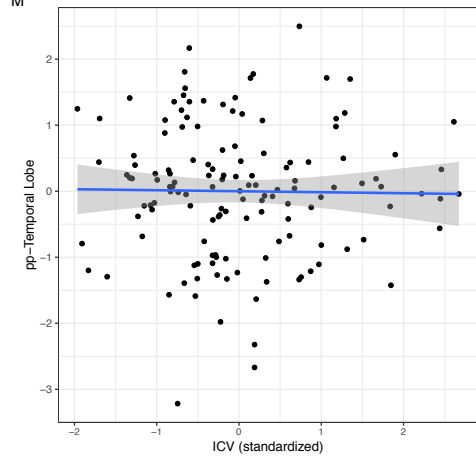

O

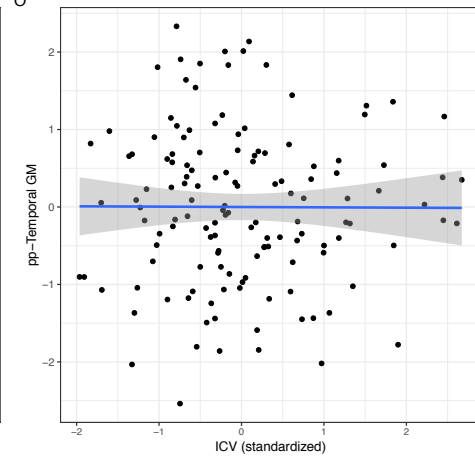

P

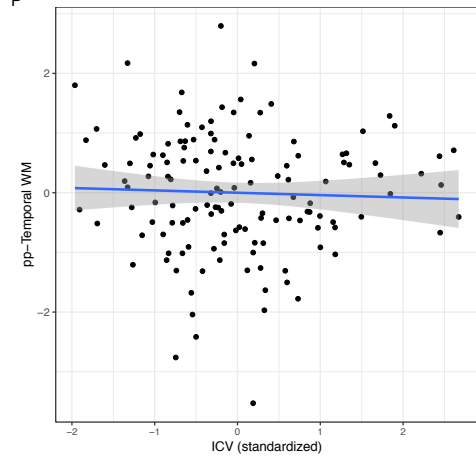

Q

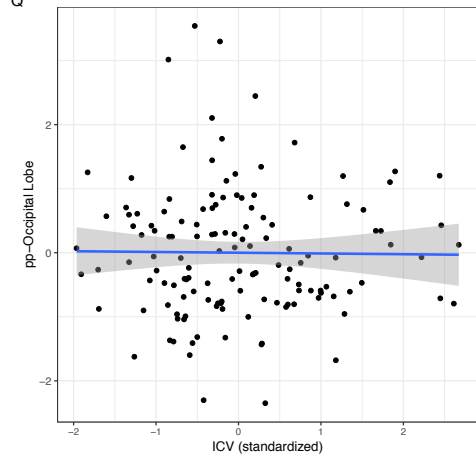

R

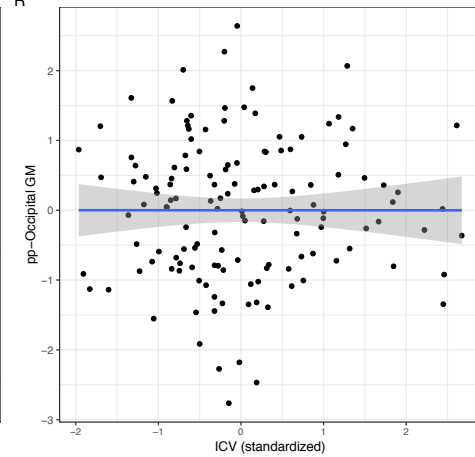

S

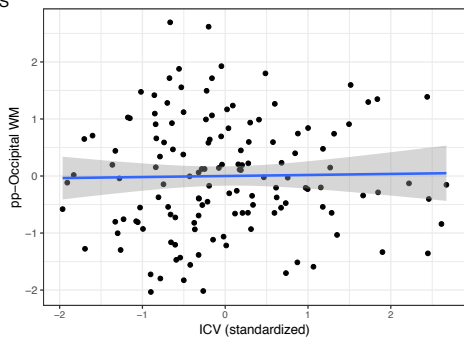

T

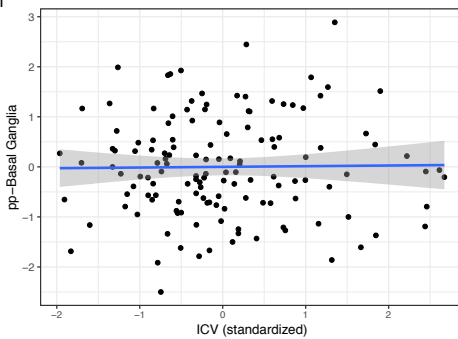

U

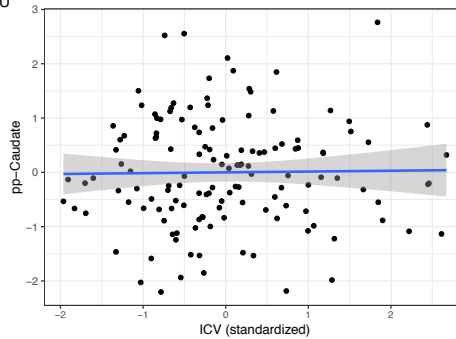

V

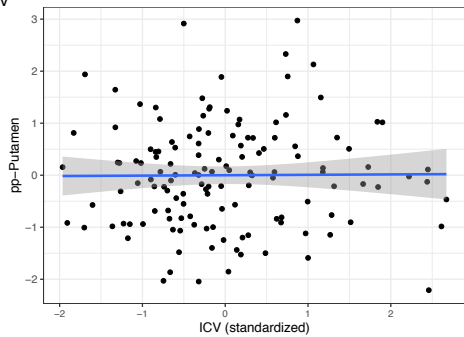

W

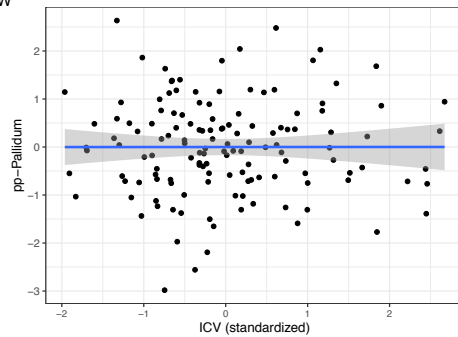

X

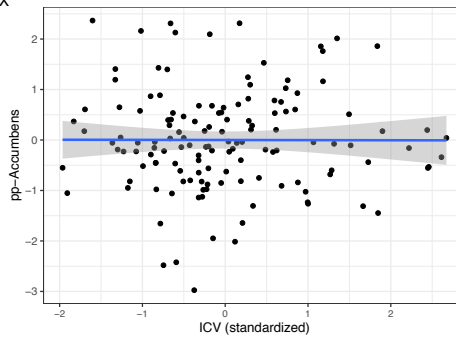

Y

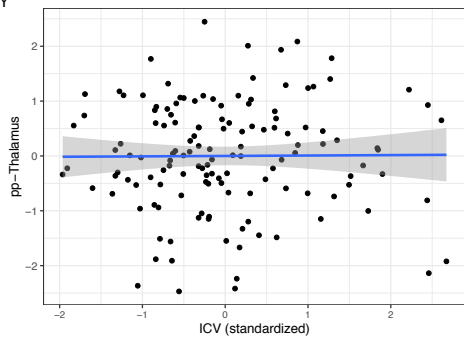

Z

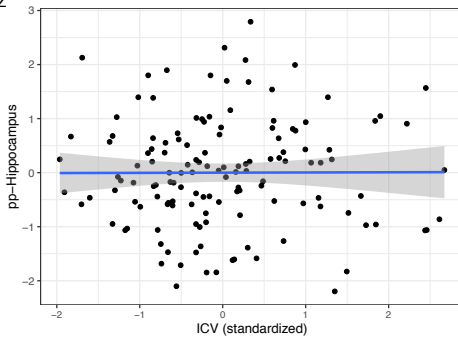

AA

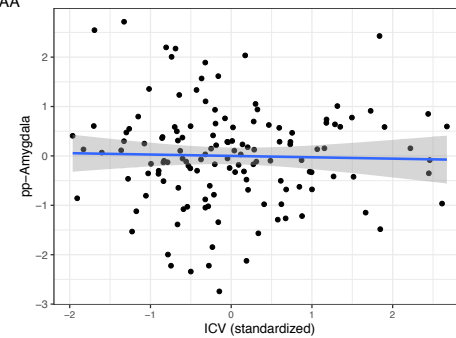

AB

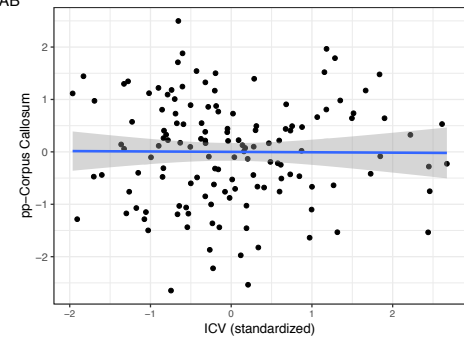

Supplement: NIHMS1623355-supplement-Supplementary_Figure_2.pdf [file NIHMS1623355-supplement-Supplementary_Figure_2.pdf]
