# Supplementary material for: Brain Structural Features of Myotonic Dystrophy Type 1 and their Relationship with CTG Repeats
Source: PubMed Central journal article supplement (PMC7480174; doi:10.3233/jnd-190397), 2019
Supplement: NIHMS1623355-supplement-Supplementary_Figure_1.pdf [file NIHMS1623355-supplement-Supplementary_Figure_1.pdf]

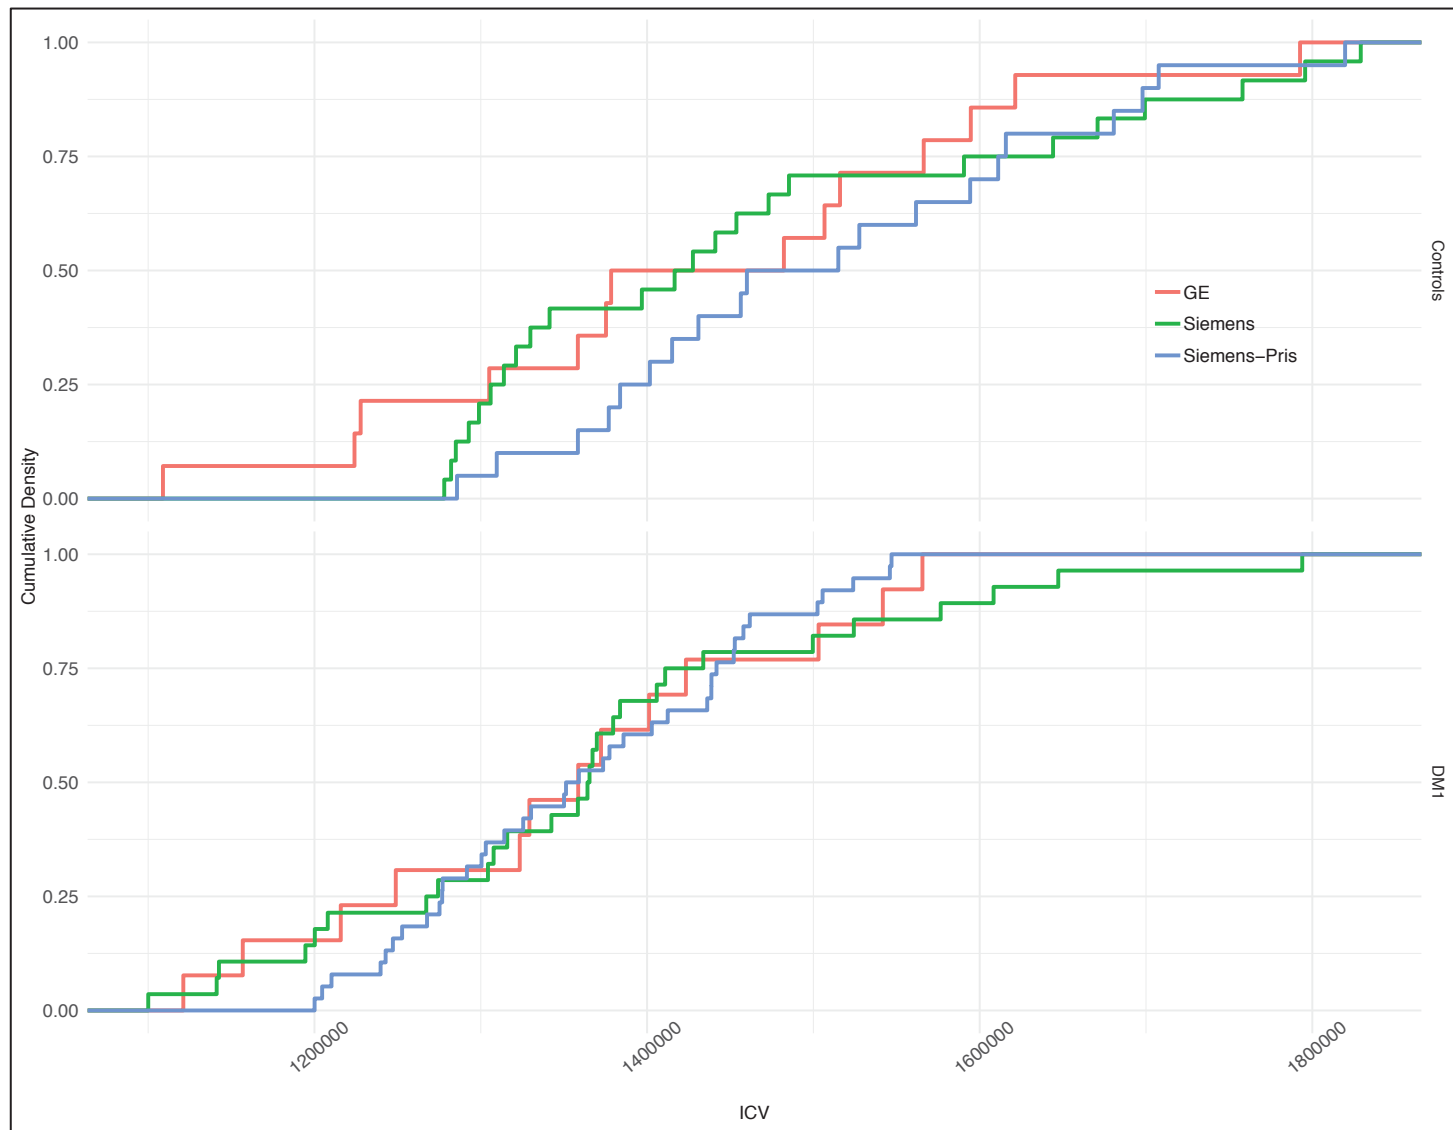

**Supplementary Figure 1:** Empirical cumulative distribution (y-axis) for each scanner (GE = red; Siemens=Green; Siemens-Pris=blue) for ICV (x-axis) shown separately for controls (top panel) and DM1 (bottom panel) following data harmonization.
